# Supplementary material
Source: PubMed Central journal article supplement (PMC7082877)
Supplement: NIHMS1549823-supplement-Supplemental_Material.pdf [file NIHMS1549823-supplement-Supplemental_Material.pdf]

## **SUPPLEMENTAL MATERIALS**

Statins Disrupt Macrophage Rac1 Regulation Leading to Increased Atherosclerotic Plaque  
Calcification

Abigail Healy, Joshua M. Berus, Jared L. Christensen, Cadence Lee, Chris Mantsounga, Willie Dong, Jerome P. Watts Jr., Maen Assali, Nicolle Ceneri, Rachael Nilson, Jade Neverson, Wen-Chih Wu, Gaurav Choudhary, and Alan R. Morrison\*

Providence VA Medical Center, Providence, Rhode Island 02908, USA.

Department of Internal Medicine (Section of Cardiovascular Medicine), Alpert Medical School at Brown University, Providence, Rhode Island, 02903 USA.

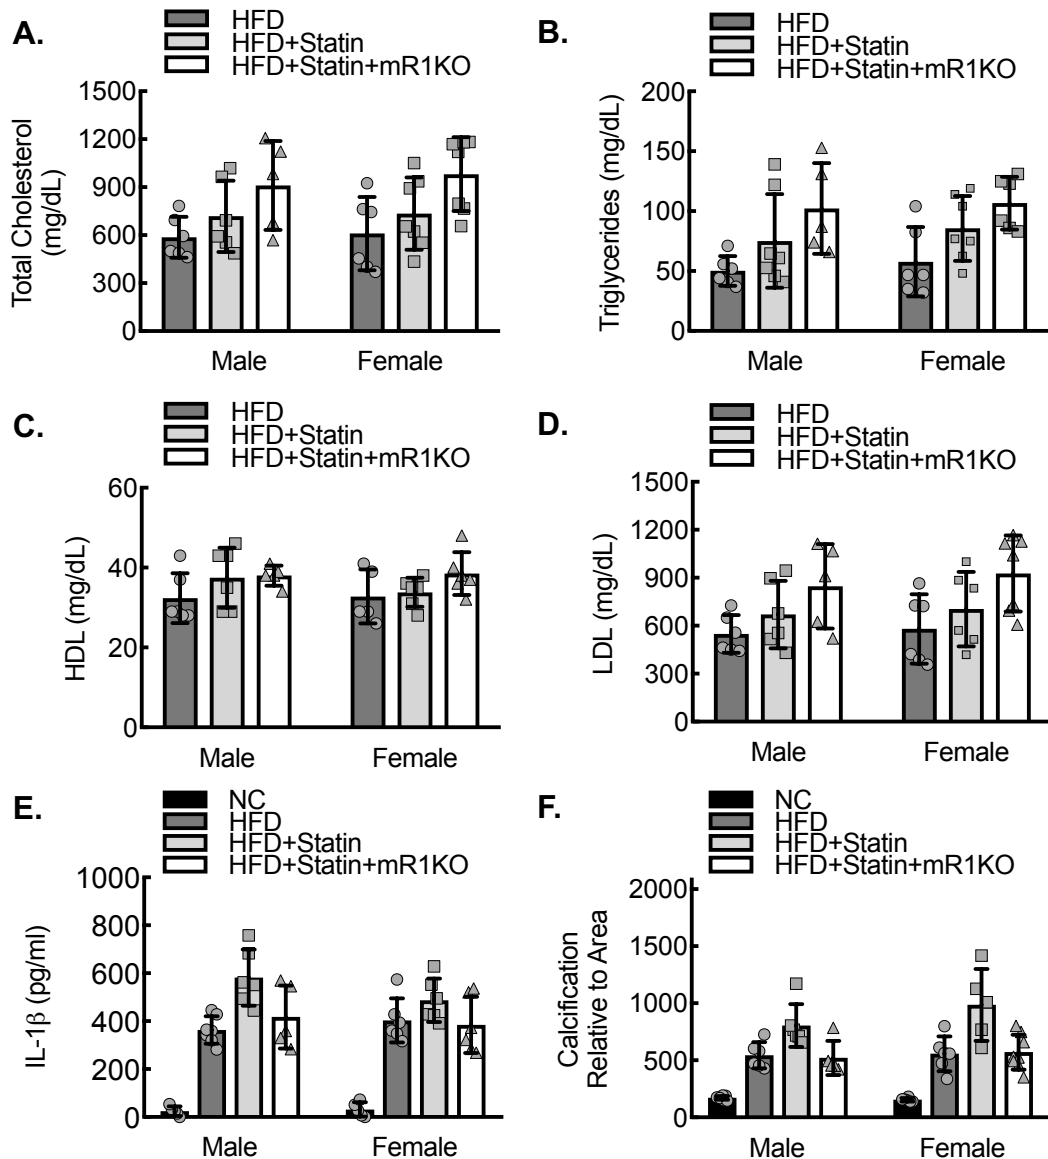

**Supplemental Figure 1. *ApoE*<sup>-/-</sup>*CSF1R*<sup>mcm</sup>*Rac1*<sup>fl/fl</sup> mice fed a HFD supplemented with atorvastatin do not demonstrate significant sex differences in lipid metabolism, serum IL-1 $\beta$  expression or atherosclerotic calcification.** Serum total cholesterol (A), triglycerides (B), HDL (C), and LDL (D) concentrations after 18 weeks of HFD, HFD+Statin or HFD+Statin+mR1KO (no significance between male and female by ANOVA;  $n=6$  male and 6 female). (E) Serum IL-1 $\beta$  concentrations by ELISA from *ApoE*<sup>-/-</sup>*CSF1R*<sup>mcm</sup>*Rac1*<sup>fl/fl</sup> mice after 18 weeks of normal chow, HFD, HFD+Statin or HFD+Statin+mR1KO (no significance between male and female by ANOVA;  $n=6$  male and 6 female). (F) Quantification *ex vivo* near-infrared calcium imaging from mice on normal chow, HFD, HFD+Statin or HFD+Statin+mR1KO for 18 weeks (no significance between male and female by ANOVA;  $n=6$  male and 6 female).

## Major Resources Tables

### Animals (in vivo studies)

| Species | Vendor or Source       | Background Strain                                                                                                                                                                         | Sex  |
|---------|------------------------|-------------------------------------------------------------------------------------------------------------------------------------------------------------------------------------------|------|
| Mouse   | The Jackson Laboratory | B6.129P2-ApoE <sup>tm1Unc</sup> /J (ApoE <sup>-/-</sup> ) #002052                                                                                                                         | F, M |
| Mouse   | The Jackson Laboratory | B6.129P2-ApoE <sup>tm1Unc</sup> /J (ApoE <sup>-/-</sup> ) #002052, Tg(Csf1r-Mer-iCre-Mer)1Jwp (CSF1R <sup>mcm</sup> ) #019098, Rac1 <sup>tm1Djk</sup> /J (Rac1 <sup>fl/fl</sup> ) #005550 | F, M |

### Animal breeding

|                            | Species | Vendor or Source       | Background Strain                                                                                                 | Other Information |
|----------------------------|---------|------------------------|-------------------------------------------------------------------------------------------------------------------|-------------------|
| <b>Parent 1.1 - Male</b>   | Mouse   | The Jackson Laboratory | B6.129P2-ApoE <sup>tm1Unc</sup> /J #002052                                                                        |                   |
| <b>Parent 1.2 - Female</b> | Mouse   | The Jackson Laboratory | B6.129P2-ApoE <sup>tm1Unc</sup> /J #002052                                                                        |                   |
| <b>Parent 2.1 - Male</b>   | Mouse   | The Jackson Laboratory | B6.129P2-ApoE <sup>tm1Unc</sup> /J #002052, Tg(Csf1r-Mer-iCre-Mer)1Jwp #019098, Rac1 <sup>tm1Djk</sup> /J #005550 |                   |
| <b>Parent 2.2 - Female</b> | Mouse   | The Jackson Laboratory | B6.129P2-ApoE <sup>tm1Unc</sup> /J #002052, Tg(Csf1r-Mer-iCre-Mer)1Jwp #019098, Rac1 <sup>tm1Djk</sup> /J #005550 |                   |

### Antibodies

| Target antigen     | Vendor or Source     | Catalog # | Working concentration | Lot # (preferred but not required) |
|--------------------|----------------------|-----------|-----------------------|------------------------------------|
| Activated Rac1-GTP | New East Biosciences | 26903     | 1:100 (1mg/mL)        |                                    |

|                                                         |               |         |                  |  |
|---------------------------------------------------------|---------------|---------|------------------|--|
| Anti-Actin, Alpha-Smooth Muscle-cy3 Mouse Monoclonal    | Sigma-Aldrich | C6198   | 1:200 (1mg/mL)   |  |
| Anti-CD68 Rat Monoclonal                                | BioLegend     | 137002  | 1:100 (0.5mg/mL) |  |
| Anti-Alkaline Phosphatase, Tissue Non-Specific Antibody | Abcam         | Ab65834 | 1:500 (0.5mg/mL) |  |
| Anti-Rac1 Antibody                                      | Abcam         | Ab97732 | 1:100 (1mg/mL)   |  |
| Goat Anti-Rat IgG H&L (Cy5)                             | Abcam         | Ab6565  | 1:500 (1mg/mL)   |  |
| Goat Anti-Mouse IgG, IgM (H+L), Alexa Fluor 488         | Invitrogen    | A10680  | 1:500 (2mg/mL)   |  |
| Anti-RUNX2 Antibody                                     | Abcam         | Ab76956 | 1:100 (1mg/mL)   |  |
| Goat Anti-Mouse IgG2b, Alexa Fluor 488                  | Invitrogen    | A21141  | 1:500 (2mg/mL)   |  |
| Goat Anti-Rabbit IgG, Alexa Fluor 488                   | Invitrogen    | A27034  | 1:500 (1mg/mL)   |  |
| Goat Anti-Mouse IgM, Alexa Fluor 488                    | Invitrogen    | A21042  | 1:500 (2mg/mL)   |  |

### Cultured Cells

| Name                                    | Vendor or Source | Sex (F, M, or unknown) |
|-----------------------------------------|------------------|------------------------|
| Primary Bone Marrow Derived Macrophages | Above animals    | F, M                   |
